# Supplementary material for: Physiological and Transcriptional Analysis Provides Insights into Tea Saponin Biosynthesis and Regulation in Response to SA in Camellia vietnamensis Huang
Source: MDPI journal article supplement (doi:10.3390/horticulturae10010008), 2023-12-20
Supplement: s1 [file s1]

## Attached Figures

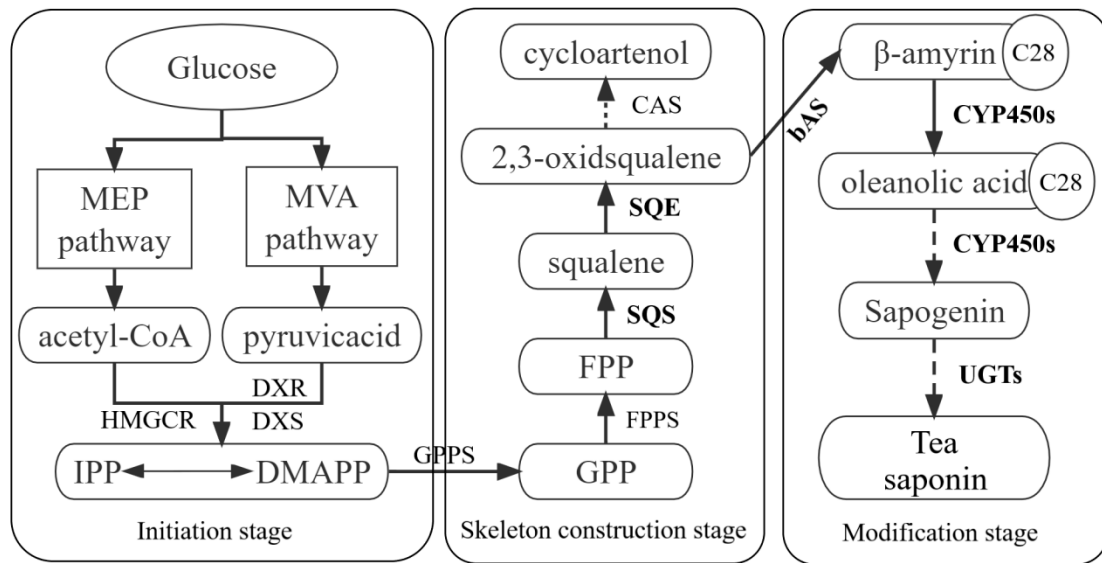

**Figure S1** Frame diagram of tea saponin synthesis

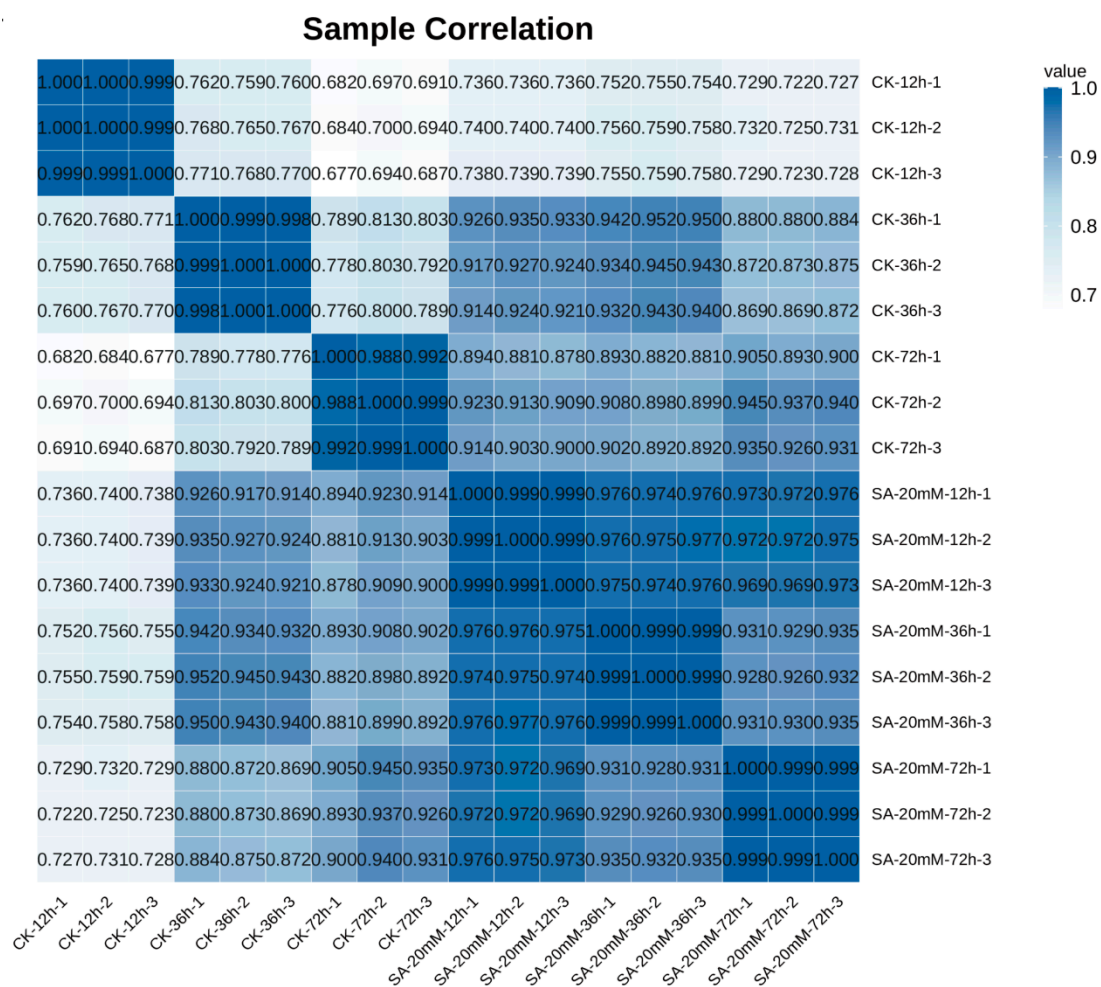

**Figure S2 Correlation heat map**



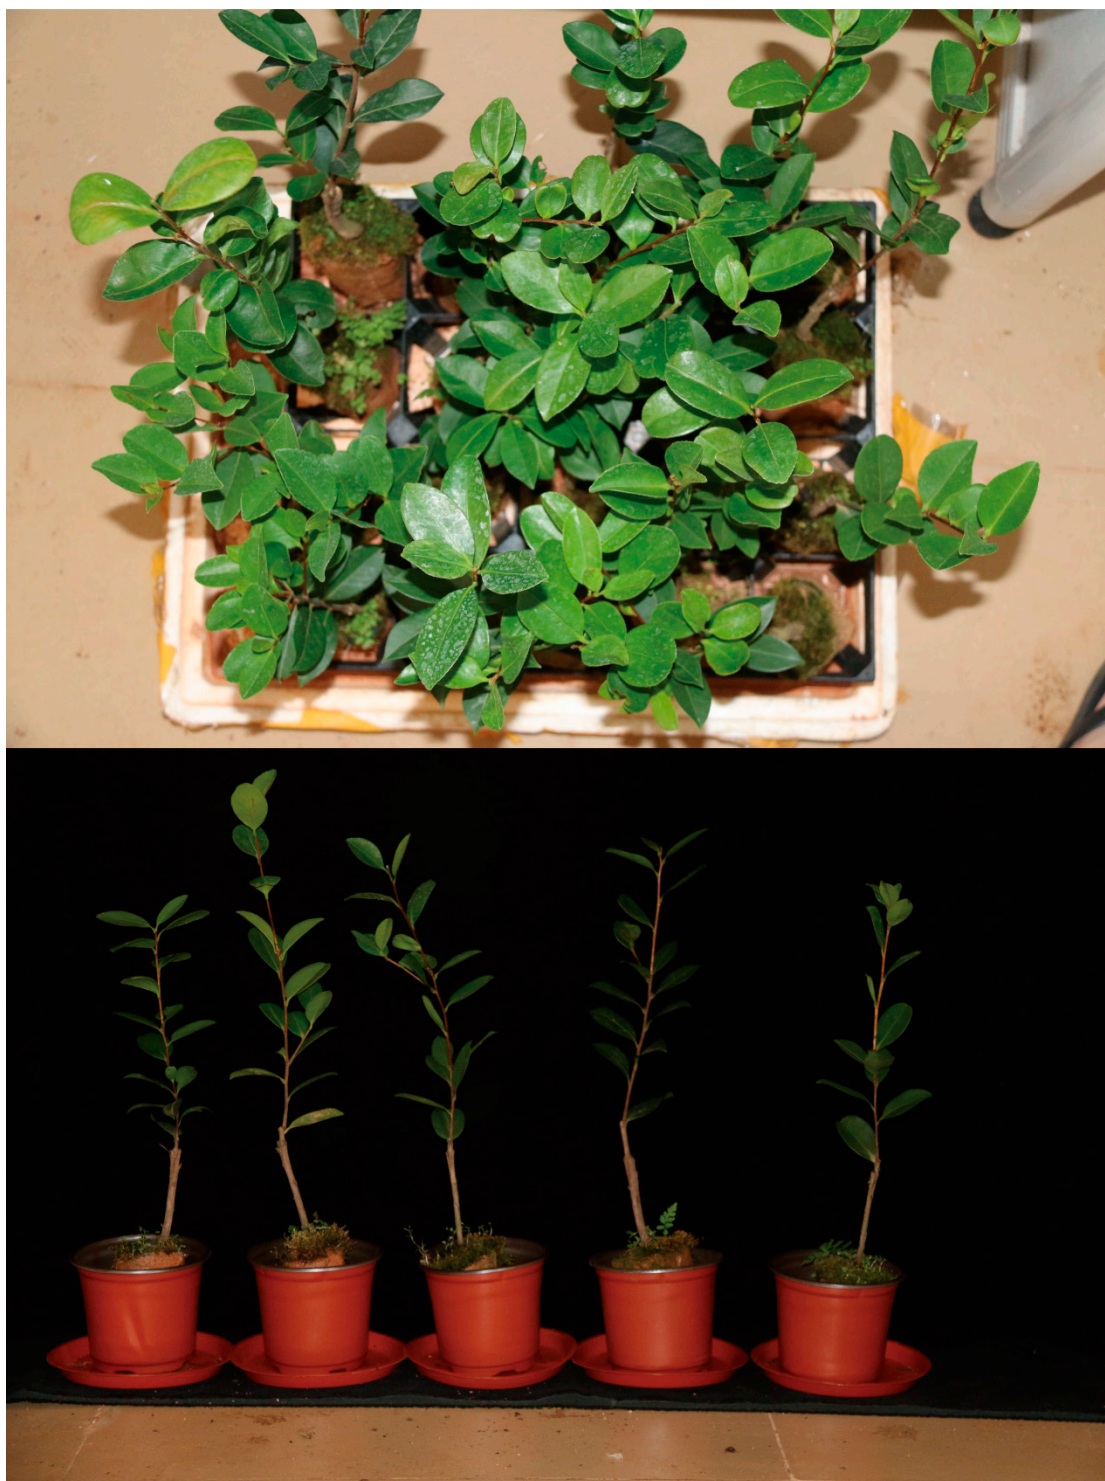

Figure S4 Some photos of *Camellia vietnamensis* Huang
