# Supplementary material for: Physiological and Transcriptional Analysis Provides Insights into Tea Saponin Biosynthesis and Regulation in Response to SA in Camellia vietnamensis Huang
Source: MDPI journal article supplement (doi:10.3390/horticulturae10010008), 2023-12-20
Supplement: s1 [file s1]

Archive with 2 entries (2 files):
- Attached Figures.pdf
- Attached Tables.xls
