# Supplementary material for: Physiological and Transcriptional Analysis Provides Insights into Tea Saponin Biosynthesis and Regulation in Response to SA in Camellia vietnamensis Huang
Source: MDPI journal article supplement (doi:10.3390/horticulturae10010008), 2023-12-20
Supplement: s1 [file s1 › Attached Tables.xls]

## Sheet: Table S1
Table S1. List of real-time PCR primers for key genes of tea saponin synthesis in C. vietnamensis
Gene ID	Gene name	Forward primer sequences	Reverse primer sequences
LOK49_LG01G02717	q-CvHMGCR-1	GGAAACTTTTGCTCGGACA	TCTGTGATGATTGCCTCGC
LOK49_LG04G01395	q-CvHMGCR-2	TCCATTGAGGTGGGAACAGT	TTTGTTTGCACCCTTCACTC
LOK49_LG02G03744	q-CvSQS	ATGAGGCGTGGTCTTACTG	TGACCTTTGACTTCAGCAT
LOK49_LG12G00606	q-CvSQE-1	GGCATCCACAATAAACACG	GCCACCAAGGCTCAGATAA
LOK49_LG05G03240	q-CvSQE-2	TTTGACTGGTGGAGGAATGA	ATTTAGGTCACGCAGAGGCT
LOK49_Contig372G00001	q-CvbAS-1	CAATGCTGTTGAAAGAGGTC	CTGACCAATCGAATAGACCA
LOK49_LG10G01169	q-CvbAS-2	TCGGATGTGTCGAGAAGGT	TCCATCTTCAGCAACCCAG
LOK49_LG05G03101	q-CvCPR	GAGGGACCAGAGAAGGAGT	TTCGCATCACCACAAACAT
LOK49_LG09G00783	q-CvCYP716-1	CCACACAAGTTTGACCCATC	ATACTCTTTTCCTGGGCACA
LOK49_LG06G02096	q-CvCYP716-2	GGACTGTTTCAACTGCCATA	AGCCTGTTTCCCCTTTGATA
LOK49_LG02G04038	q-CvCYP87-1	GAAATGTAGCTCCAGGGTTG	ATCAAAATGTTCCAACCAGC
LOK49_LG02G04040	q-CvCYP87-2	TAGCACCAGGACTGTTGAGA	ATCAAAATGTTCCAACCAGC
LOK49_LG07G01761	q-CvCYP72-1	CTCAGTTTTGCTTGTGTGGA	TGTCATTCCCAAATACTTCC
MSTRG.51406	q-CvCYP72-2	ACCTTTTCAAGCCAGAGAGA	GTTCAAACCCACACACATTC
LOK49_LG07G02033	q-CvCYP72-3	GTAGTTTGGTTGCATCGAGT	TTTCACGGTCATAATGTAGC
LOK49_LG03G01315	q-CvUGT-1	TGCCATTGACGAAAACCAGT	ACTGAAGAGGTGAGAGGCGA
LOK49_LG11G01989	q-CvUGT-2	GGATTTTTATCGCATTGTGG	CACCACCAACTTAGCATCGT
MSTRG.16494	q-CvUGT-3	GGAGTAGAAGGTAGGGGTGT	AAGTTGCTTAGCTCGCTCTC
LOK49_LG05G01635	q-CvUGT-4	GAGGATGTGTGGGGTGTAGG	CCTTCCATCACCTCCCGTAT
LOK49_LG06G02011	q-CvUGT-5	CTTGTTGGTTGGATGGAGTC	CACTCCCAAACTCAATGCTT
-	GAPDH	TTGGCATCGTTGAGGGTCT	CAGTGGGAACACGGAAAGC

## Sheet: Table S2
Table S2. The RT-qPCR reaction system
Reagent	Volume/µL
MonAmpTM ChemoHS qPCR Mix	10
Primer F（10 µM）	0.4
Primer R（10 µM）	0.4
Template cDNA	0.5
ddH2O	8.7
Total volume	20

## Sheet: Table S3
Table S3. The RT-qPCR reaction procedure
Steps	Temperature	Time	Cycles
Preincubation	95 ℃	10 min	1
2 Step Amplification	95 ℃	10 s	40
	60 ℃	10 s
Melting	95 ℃	10 s	1
	60 ℃	60 s
	95 ℃	15 s
Cooling	37 ℃	30 s	1

## Sheet: Table S4
Table S4. Transcript information of triterpenoid saponin biosynthesis pathway
Transcript id	CK-12h	CK-36h	CK-72h	SA-20mM-12h	SA-20mM-36h	SA-20mM-72h
LOK49_LG01G02717 (HMGR)	11.894	24.204	16.43	48.227	27.542	20.249
LOK49_LG02G04071 (HMGR)	4.498	6.331	6.047	16.592	7.227	16.272
LOK49_LG04G01395 (HMGR)	90.588	22.958	28.581	68.287	44.965	43.048
LOK49_LG05G03940 (HMGR)	1.415	0.571	0.444	0.796	0.224	1.25
LOK49_LG08G00037 (HMGR)	5.77	1.284	1.946	1.546	0.67	2.804
LOK49_Contig133G00003 (DXR)	0.189	0.476	0.269	0.522	0.115	0.069
LOK49_LG14G00926 (DXR)	75.148	67.053	87.662	96.934	107.179	84.552
LOK49_LG04G00450 (DXS)	6.453	2.884	4.151	15.796	9.723	12.874
LOK49_LG06G03179 (DXS)	64.566	57.226	59.284	31.022	38.678	40.084
LOK49_LG06G03180 (DXS)	136.452	124.549	127.166	64.405	87.737	89.826
LOK49_LG08G03101 (DXS)	10.437	24.065	14.069	17.753	17.434	13.487
LOK49_LG11G02318 (DXS)	3.184	2.845	2.687	2.781	1.755	3.275
LOK49_LG02G03994 (GPPS)	40.339	42.657	62.358	64.354	63.82	50.865
LOK49_LG08G00586 (GPPS)	30.733	17.419	23.57	18.913	13.527	21.129
LOK49_LG06G00257 (FPPS)	42.986	29.563	41.484	40.949	25.497	28.867
LOK49_LG07G03547 (FPPS)	17.027	20.416	25.151	17.64	20.918	20.042
LOK49_LG07G03548 (FPPS)	104.796	98.447	113.708	100.691	129.352	114.926
LOK49_LG01G03762 (SQS)	8.106	7.392	14.168	9.513	7.874	8.295
LOK49_LG02G03744 (SQS)	52.758	35.747	54.925	55.939	38.254	50.3
LOK49_LG04G00200 (SQS)	22.873	26.083	20.519	19.181	26.244	19.345
LOK49_LG04G03838 (SQS)	40.881	38.099	67.934	34.218	33.505	38.66
LOK49_LG09G01551 (SQS)	136.026	189.713	157.308	157.19	169.965	143.782
LOK49_LG01G03119 (SQE)	16.885	18.335	18.491	14.082	17.048	13.018
LOK49_LG04G03166 (SQE)	21.895	12.653	28.77	7.374	1.443	2.628
LOK49_LG05G03240 (SQE)	0.797	0.355	0.492	0.106	0.774	0.441
LOK49_LG08G00838 (SQE)	1.482	1.387	1.342	0.838	0.497	0.249
LOK49_LG12G00606 (SQE)	220.926	62.215	91.08	91.367	72.19	88.741
LOK49_Contig372G00001 (bAS)	93.754	57.804	98.741	97.944	56.929	100.373
LOK49_LG02G00873 (bAS)	1.938	0.841	3.969	2.482	1.826	2.034
LOK49_LG10G01169 (bAS)	128.761	78.611	138.597	139.292	71.042	142.586
LOK49_LG10G01171 (bAS)	0.584	0.286	3.154	0.748	0.221	2.932
LOK49_LG10G01173 (bAS)	1.132	0.917	2.173	0.858	1.392	0.737
LOK49_LG01G02154 (CYP716)	0.071	0.015	0.471	0.319	0.698	0.044
LOK49_LG01G02167 (CYP716)	0.071	0.015	0.506	0.319	0.698	0.103
LOK49_LG06G02096 (CYP716)	0.61	0.689	0.938	0.754	0.767	0.645
LOK49_LG08G00670 (CYP716)	31.934	22.349	22.865	13.41	8.564	11.986
LOK49_LG09G00783 (CYP716)	0.643	0.849	4.148	3.226	3.978	0.657
LOK49_LG10G00578 (CYP716)	0.608	0.09	1.379	1.049	1.057	0.429
LOK49_LG13G00044 (CYP716)	39.388	14.187	50.935	17.775	1.754	3.987
LOK49_LG13G02926 (CYP716)	2.444	0.143	5.532	2.061	0.977	1.182
LOK49_LG02G04038 (CYP87)	293.944	496.378	127.86	363.595	397.158	239.736
LOK49_LG02G04040 (CYP87)	20.729	24.996	30.763	48.605	53.129	32.53
LOK49_LG08G01502 (CYP87)	2.89	1.429	1.53	1.197	0.354	0.833
LOK49_LG09G00853 (CYP87)	77.134	100.312	136.14	50.48	3.56	4.711
LOK49_LG09G00855 (CYP87)	0.165	0.298	0.825	0.057	0.185	0.285
LOK49_LG09G02238 (CYP87)	367.815	260.476	278.568	129.357	29.585	44.063
LOK49_LG01G02158 (UGT)	24.739	25.06	26.55	20.034	25.622	22.714
LOK49_LG01G02176 (UGT)	11.392	12.692	24.951	23.371	12.3	26.663
LOK49_LG02G02574 (UGT)	6.688	1.239	10.233	13.121	11.598	15.61
LOK49_LG03G02219 (UGT)	6.539	3.266	13.528	7.533	5.56	4.779
LOK49_LG05G01635 (UGT)	18.898	10.298	41.868	27.317	15.383	38.026
LOK49_LG05G03737 (UGT)	139.196	114.257	78.942	93.605	92.257	104.528
LOK49_LG06G00952 (UGT)	15.365	18.649	15.33	16.971	20.747	17.523
LOK49_LG06G02008 (UGT)	5.164	2.387	4.518	6.574	3.297	9.618
LOK49_LG06G02011 (UGT)	31.928	29.713	77.8	50.825	28.045	77.954
LOK49_LG06G02012 (UGT)	18.858	10.975	10.893	12.41	7.283	11.349
LOK49_LG08G00915 (UGT)	18.442	21.089	16.875	20.242	27.93	17.164
LOK49_LG11G01989 (UGT)	20.072	10.856	28.055	20.822	20.868	46.376
MSTRG.16494 (UGT)	1.376	2.136	1.436	4.017	2.622	1.49
MSTRG.21099 (UGT)	3.05	4.57	2.883	2.042	1.562	4.901
